# Supplementary material for: Chelating and ‘pincer’ dicarbene complexes of palladium; synthesis and structural studiesElectronic supplementary information (ESI) available: crystallographic data and ORTEP plot for compound 5c. See http://www.rsc.org/suppdata/dt/b2/b209739g/
Source: Royal Society of Chemistry journal article supplement (doi:10.1039/b209739g), 2003-01-30
Supplement: b209739g.pdf [file b209739g.pdf]

---

## Chelating and 'pincer' dicarbene complexes of palladium; synthesis and structural studies

---

Scott Winston,<sup>a</sup> Andreas A. Danopoulos,<sup>\*a</sup> Arran A. D. Tulloch,<sup>a</sup> Graham Eastham<sup>b</sup> and Michael B. Hursthouse<sup>a</sup>

<sup>a</sup> Department of Chemistry, University of Southampton, Highfield, Southampton, UK, SO17 1BJ. E-mail: ad1@soton.ac.uk

<sup>b</sup> Ineos Acrylics, Wilton, P. O. Box 90, Middlesbrough, Cleveland, UK, TS90 8JE.

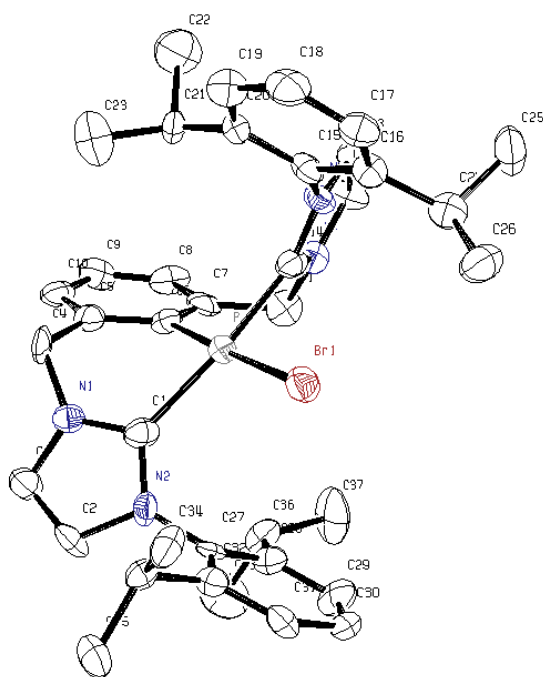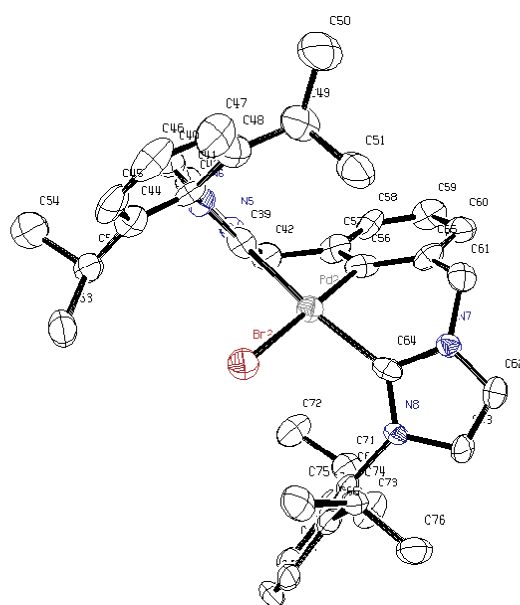

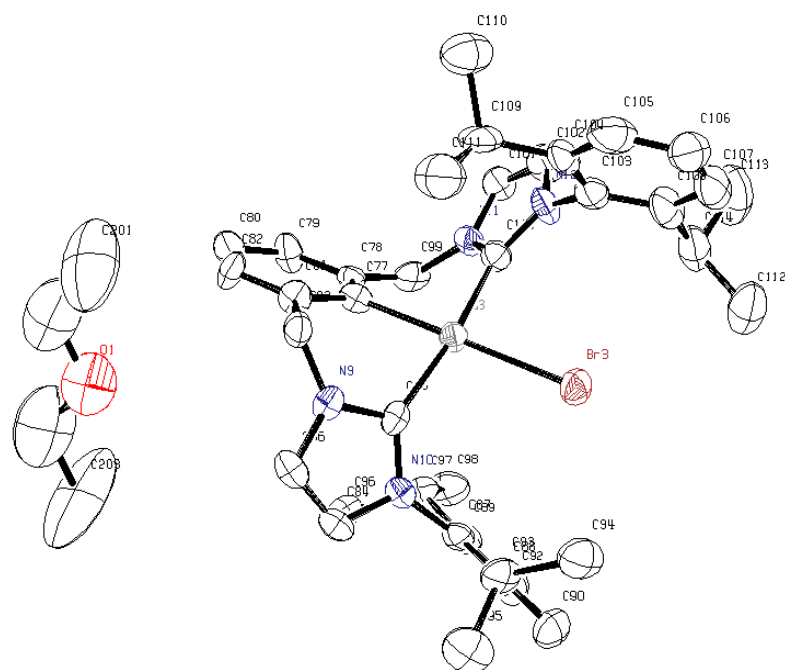

Table 1. Crystal data and structure refinement for 01sw049.

|                                   |                                                   |                             |
|-----------------------------------|---------------------------------------------------|-----------------------------|
| Identification code               | s92                                               |                             |
| Empirical formula                 | C118 H145 Br3 N12 O Pd3                           |                             |
| Formula weight                    | 2306.39                                           |                             |
| Temperature                       | 150(2) K                                          |                             |
| Wavelength                        | 0.71073 Å                                         |                             |
| Crystal system                    | Triclinic                                         |                             |
| Space group                       | P-1                                               |                             |
| Unit cell dimensions              | a = 16.0118(6) Å                                  | $\alpha = 110.001(2)^\circ$ |
|                                   | b = 16.4652(6) Å                                  | $\beta = 96.4400(10)^\circ$ |
|                                   | c = 23.5036(10) Å                                 | $\gamma = 93.111(2)^\circ$  |
| Volume                            | 5757.4(4) Å <sup>3</sup>                          |                             |
| Z                                 | 2                                                 |                             |
| Density (calculated)              | 1.330 Mg/m <sup>3</sup>                           |                             |
| Absorption coefficient            | 1.556 mm <sup>-1</sup>                            |                             |
| F(000)                            | 2376                                              |                             |
| Crystal size                      | 0.03 x 0.03 x 0.01 mm <sup>3</sup>                |                             |
| Theta range for data collection   | 1.87 to 30.43°                                    |                             |
| Index ranges                      | -20 ≤ h ≤ 22, -22 ≤ k ≤ 19, -32 ≤ l ≤ 31          |                             |
| Reflections collected             | 75784                                             |                             |
| Independent reflections           | 25601 [R(int) = 0.2463]                           |                             |
| Completeness to theta = 30.43°    | 73.3 %                                            |                             |
| Absorption correction             | Semi-empirical from equivalents                   |                             |
| Max. and min. transmission        | 0.9846 and 0.9548                                 |                             |
| Refinement method                 | Full-matrix-block least-squares on F <sup>2</sup> |                             |
| Data / restraints / parameters    | 25601 / 0 / 1234                                  |                             |
| Goodness-of-fit on F <sup>2</sup> | 0.980                                             |                             |
| Final R indices [I > 2σ(I)]       | R1 = 0.0922, wR2 = 0.1513                         |                             |
| R indices (all data)              | R1 = 0.2882, wR2 = 0.2074                         |                             |
| Largest diff. peak and hole       | 0.917 and -1.113 e.Å <sup>-3</sup>                |                             |
